# Supplementary material for: Brain Ischemia Induces Diversified Neuroantigen-Specific T-Cell Responses That Exacerbate Brain Injury
Source: PubMed Central journal article supplement — Stroke. 2018 Apr 25;49(6):1471–8. doi: 10.1161/STROKEAHA.118.020203 (PMC5976228; doi:10.1161/strokeaha.118.020203), 2018-04-25
Supplement: str-49-1471-s002.pdf [file str-49-1471-s002.pdf]

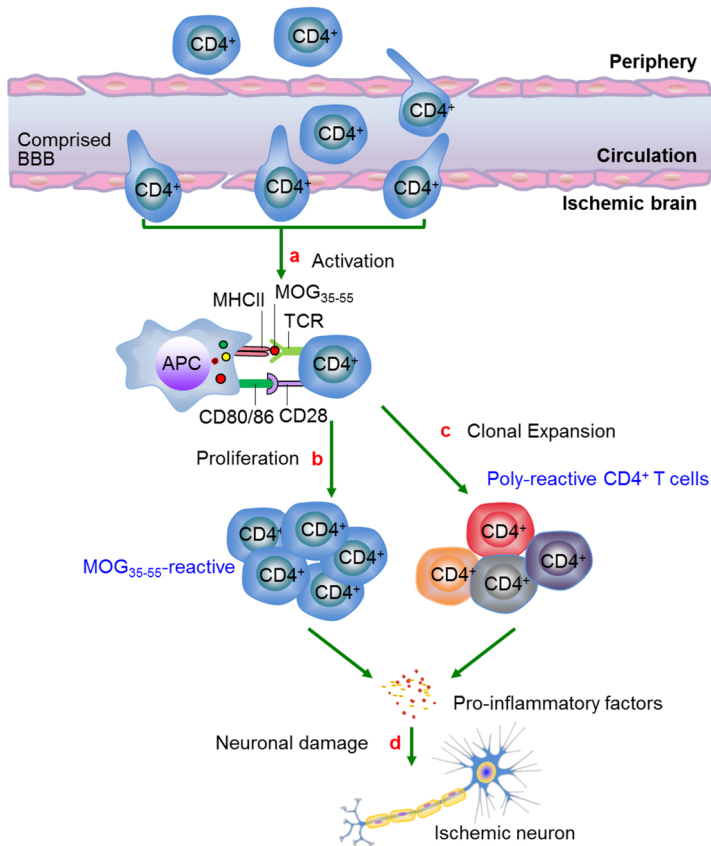

Upon brain ischemia, MOG<sub>35-55</sub>-reactive CD4<sup>+</sup> T cells enter the circulation and extravagate into the brain. Neuroantigens released after brain ischemia are phagocytosed, processed and presented by APCs including brain-resident microglia to MOG<sub>35-55</sub>-reactive CD4<sup>+</sup> T cells. Thereby, the MOG<sub>35-55</sub>-reactive CD4<sup>+</sup> T cells are activated by APCs (a), and then undergo *in situ* proliferation (b), or clonal expansion (c). These newly emerged T cell clones together with MOG<sub>35-55</sub>-reactive T cells can be activated by APCs and produce pro-inflammatory factors that aggravate BBB disruption, inflammation and neuronal damage (d). a: Activation; b: Proliferation; c: Clonal expansion; d: neuronal damage.
